# Supplementary material
Source: publisher site journal article supplement (https://www.dovepress.com/article/604548)
Supplement: Supplementary file 1 [file Supplementary%20Material.docx]

| **eTable 1 The full search strategies of all databases** | | | |
| --- | --- | --- | --- |
|  | **Coverage** | **Searches** | **Hits** |
| PubMed Database | Date of inception -December 19, 2025 | #1 trigeminal neuralgia[Mesh] OR primary trigeminal neuralgia[Title/Abstract] OR idiopathic trigeminal neuralgia[Title/Abstract] OR classical trigeminal neuralgia[Title/Abstract]  #2 Acupuncture[Mesh] OR Acupuncture Therapy[Mesh] OR Meridians[Mesh]  #3 Acupuncture[Title/Abstract] OR Acupuncture Treatment*[Title/Abstract] OR Acupuncture Therapy[Title/Abstract] OR Acupuncture Therapies[Title/Abstract] OR Pharmacoacupuncture[Title/Abstract] OR Acupotomy[Title/Abstract] OR Acupotomies[Title/Abstract] OR Pharmacopuncture[Title/Abstract] OR Dry-needling[Title/Abstract] OR Body-acupuncture[Title/Abstract] OR Electroacupuncture[Title/Abstract] OR Electro-acupuncture[Title/Abstract] OR Auricular Acupuncture[Title/Abstract] OR Warm Needle[Title/Abstract] OR Meridian* [Title/Abstract] OR Ching Lo[Title/Abstract] OR Jing Luo[Title/Abstract] OR Jing mai[Title/Abstract] OR Jingluo[Title/Abstract] OR Jingmai[Title/Abstract]  #4 #2 OR #3  #5 ("clinical"[Title/Abstract] AND "trial"[Title/Abstract]) OR "clinical trials as topic"[MeSH Terms] OR "clinical trial"[Publication Type] OR "random*"[Title/Abstract] OR "random allocation"[MeSH Terms] OR "therapeutic use"[MeSH Subheading]  #6 #1 AND #4 AND #5 | 51 |
| EMBASE Database | Date of inception -December 19, 2025 | #1 'trigeminal neuralgia'/exp  #2 'primary trigeminal neuralgia':ti,ab,kw OR 'trigeminal neuralgia':ti,ab,kw OR 'idiopathic trigeminal neuralgia':ti,ab,kw OR 'classical trigeminal neuralgia':ti,ab,kw  #3 #1 OR #2  #4 'acupuncture'/exp  #5 'acupuncture':ti,ab,kw OR 'acupuncture treatment':ti,ab,kw OR 'acupuncture therapy':ti,ab,kw OR 'acupuncture therapies':ti,ab,kw OR pharmacoacupuncture:ti,ab,kw OR acupotomy:ti,ab,kw OR acupotomies:ti,ab,kw OR pharmacopuncture:ti,ab,kw OR 'dry needling':ti,ab,kw OR 'body acupuncture':ti,ab,kw OR electroacupuncture:ti,ab,kw OR 'electro acupuncture':ti,ab,kw OR 'auricular acupuncture':ti,ab,kw OR 'warm needle':ti,ab,kw OR meridian:ti,ab,kw OR 'ching lo':ti,ab,kw OR 'jing luo':ti,ab,kw OR 'jing mai':ti,ab,kw OR jingluo:ti,ab,kw OR jingmai:ti,ab,kw  #6 #4 OR #5  #7 'randomized controlled trial':ti,ab,kw  #8 'clinical trials, randomized' OR 'controlled clinical trials, randomized' OR 'clinical trials as topic'/exp/mj OR 'random allocation'/exp/mj  #9 #7 OR #8  #10 #3 AND #6 AND #9 | 10 |
| Web of Science | Date of inception -December 19, 2025 | TS=(‘primary trigeminal neuralgia*’ OR ‘trigeminal neuralgia*’ OR ‘idiopathic trigeminal neuralgia*’ OR ‘classical trigeminal neuralgia*’) AND TS=(‘Acupuncture’ OR ‘Acupuncture Treatment*’ OR ‘Acupuncture Therapy’ OR ‘Acupuncture Therapies’ OR ‘Pharmacoacupuncture’ OR ‘Acupotomy’ OR ‘Acupotomies’ OR ‘Pharmacopuncture’ OR ‘Dry-needling’ OR ‘Body-acupuncture’ OR ‘Electroacupuncture’ OR ‘Electro-acupuncture’ OR ‘Auricular Acupuncture’ OR ‘Warm Needle’ OR ‘Meridian*’ OR ‘Ching Lo’ OR ‘Jing Luo’ OR ‘jing mai’ OR ‘Jingluo’ OR ‘jingmai’) AND TS= (‘random*’ AND ‘trial’ ) | 22 |
| Cochrane Library | Date of inception -December 19, 2025 | #1 MeSH descriptor: [Trigeminal Neuralgia] explode all trees  #2 (trigeminal neuralgia OR primary trigeminal neuralgia OR idiopathic trigeminal neuralgia OR classical trigeminal neuralgia):ti,ab,kw (Word variations have been searched)  #3 #1 or #2  #4 MeSH descriptor: [Acupuncture] explode all trees  #5 MeSH descriptor: [Acupuncture Therapy] explode all trees  #6 MeSH descriptor: [Meridians] explode all trees  #7 #4 or #5 or #6  #8 (Acupuncture OR Acupuncture Treatment OR Acupuncture Therapy OR Acupuncture Therapies OR Pharmacoacupuncture OR Acupotomy OR Acupotomies OR Pharmacopuncture OR Dry-needling OR Body-acupuncture OR Electroacupuncture OR Electro-acupuncture OR Auricular Acupuncture OR Warm Needle OR Meridian OR Ching Lo OR Jing Luo OR jing mai OR Jingluo OR jingmai):ti,ab,kw (Word variations have been searched)  #9 MeSH descriptor: [Clinical Trials as Topic] explode all trees  #10 MeSH descriptor: [Randomized Controlled Trials as Topic] explode all trees  #11 MeSH descriptor: [Controlled Clinical Trial] explode all trees  #12 #9 or #10 or #11  #13 (clinical OR trial OR random):ti,ab,kw (Word variations have been searched)  #14 #12 or #13  #15 #7 or #8  #16 #3 and #15 and #14 | 46 |
| China National Knowledge Infrastructure (CNKI, Chinese Database) | Date of inception -December 19, 2025 | SU=('Trigeminal Neuralgia' OR 'Trigeminal Nerve') AND (TKA=(‘Acupuncture’ OR ‘Acupuncture Therapy’ OR ‘Body Acupuncture’ OR ‘Manual Acupuncture’ OR ‘Electroacupuncture’ OR ‘Warm Needling’ OR ‘Scalp Acupuncture’ OR ‘Head Acupuncture’ OR ‘Auricular Acupuncture’ OR ‘Acupuncture Points’ OR ‘Fire Needling’ OR ‘Abdominal Acupuncture’ OR ‘Fu’s Subcutaneous Needling’ OR ‘Three-edged Needle’ OR ‘Nine Needles’ OR ‘Meridians’ OR ‘Transcutaneous Electrical Nerve Stimulation’ OR ‘Eye Acupuncture’ OR ‘Tongue Acupuncture’ OR ‘Wrist-Ankle Acupuncture’ OR ‘Blade Needle’ OR ‘Acupotomy’ OR ‘Bloodletting Puncture’ OR ‘Dry Needling’) OR SU=(‘Acupuncture Therapy’ OR ‘Acupuncture’ OR ‘Acupuncture-Moxibustion Therapy’)) AND (TKA=(‘Randomized’ OR ‘Controlled’) OR SU=(‘Randomized Controlled Trial’)) | 33 |
| China Biomedical Literature Service System Database  (Sino-Med, Chinese Database) | Date of inception -December 19, 2025 | #1: "trigeminal neuralgia" [unweighted: expanded]  #2: (("acupuncture therapy" [unweighted: expanded]) OR "acupuncture" [unweighted: expanded]) OR "acupuncture-moxibustion therapy" [unweighted: expanded]  #3: "acupuncture" [common fields: smart] OR "acupuncture-moxibustion" [common fields: smart] OR "manual acupuncture" [common fields: smart] OR "electroacupuncture" [common fields: smart] OR "body acupuncture" [common fields: smart] OR "warm needling" [common fields: smart] OR "scalp acupuncture" [common fields: smart] OR "auricular acupuncture" [common fields: smart]  #4: "acupoint" [common fields: smart] OR "fire needling" [common fields: smart] OR "abdominal acupuncture" [common fields: smart] OR "floating acupuncture" [common fields: smart] OR "three-edged needle" [common fields: smart] OR "nine needles" [common fields: smart] OR "meridian" [common fields: smart] OR "transcutaneous electrical nerve stimulation" [common fields: smart] OR "eye acupuncture" [common fields: smart]  #5: "tongue acupuncture" [common fields: smart] OR "wrist-ankle acupuncture" [common fields: smart] OR "blade needle" [common fields: smart] OR "needle-knife" [common fields: smart] OR "bloodletting" [common fields: smart] OR "dry needling" [common fields: smart]  #7: "randomized controlled trial" [unweighted: expanded]  #8: "random" [common fields: smart] OR "control" [common fields: smart]  #9: (#8) OR (#7)  #10: (#5) OR (#4) OR (#3) OR (#2)  #11: (#10) AND (#9) AND (#1) | 385 |
| China Science and Technology Journal Database (VIP, Chinese Database) | Date of inception -December 19, 2025 | M=("Trigeminal Neuralgia") and M= ("acupuncture" OR "acupuncture therapy" OR "body acupuncture" OR "manual acupuncture" OR "electroacupuncture" OR "warm needling" OR "scalp acupuncture" OR "head acupuncture" OR "auricular acupuncture" OR "acupuncture points" OR "fire needling" OR "abdominal acupuncture" OR "fu's subcutaneous needling" OR "three-edged needle" OR "nine needles" OR "meridians" OR "transcutaneous electrical nerve stimulation" OR "eye acupuncture" OR "tongue acupuncture" OR "wrist-ankle acupuncture" OR "blade needle" OR "acupotomy" OR "bloodletting puncture" OR "dry needling") and R=("randomized" OR "randomised" OR "controlled") | 325 |
| Wanfang Database  (WF, Chinese Database) | Date of inception -December 19, 2025 | (Title/Abstract: (idiopathic trigeminal neuralgia OR primary trigeminal neuralgia OR classical trigeminal neuralgia OR secondary trigeminal neuralgia) OR Subject: (trigeminal neuralgia)) AND (Title/Abstract: (acupuncture OR acupuncture therapy OR body acupuncture OR manual acupuncture OR electroacupuncture OR warm needling OR scalp acupuncture OR auricular acupuncture OR acupoint OR fire needling OR abdominal acupuncture OR floating acupuncture OR three-edged needle OR nine needles meridian OR transcutaneous electrical nerve stimulation OR eye acupuncture OR tongue acupuncture OR wrist-ankle acupuncture OR blade needle OR needle-knife OR bloodletting therapy OR dry needling) OR Subject: (acupuncture therapy OR acupuncture treatment OR needling)) AND (Title/Abstract: (randomized controlled OR random*) OR Subject: (randomized controlled trial)) | 43 |

**
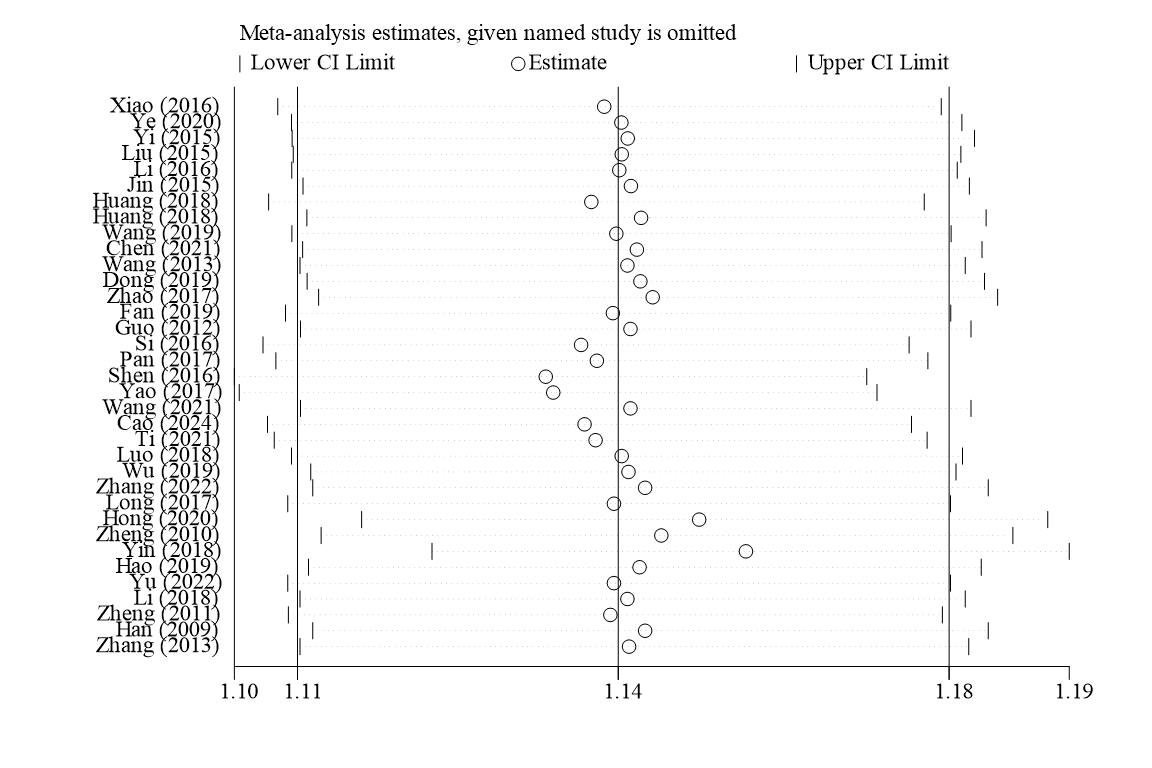
eFigure 1 Sensitivity Analysis of Response Rate**

**
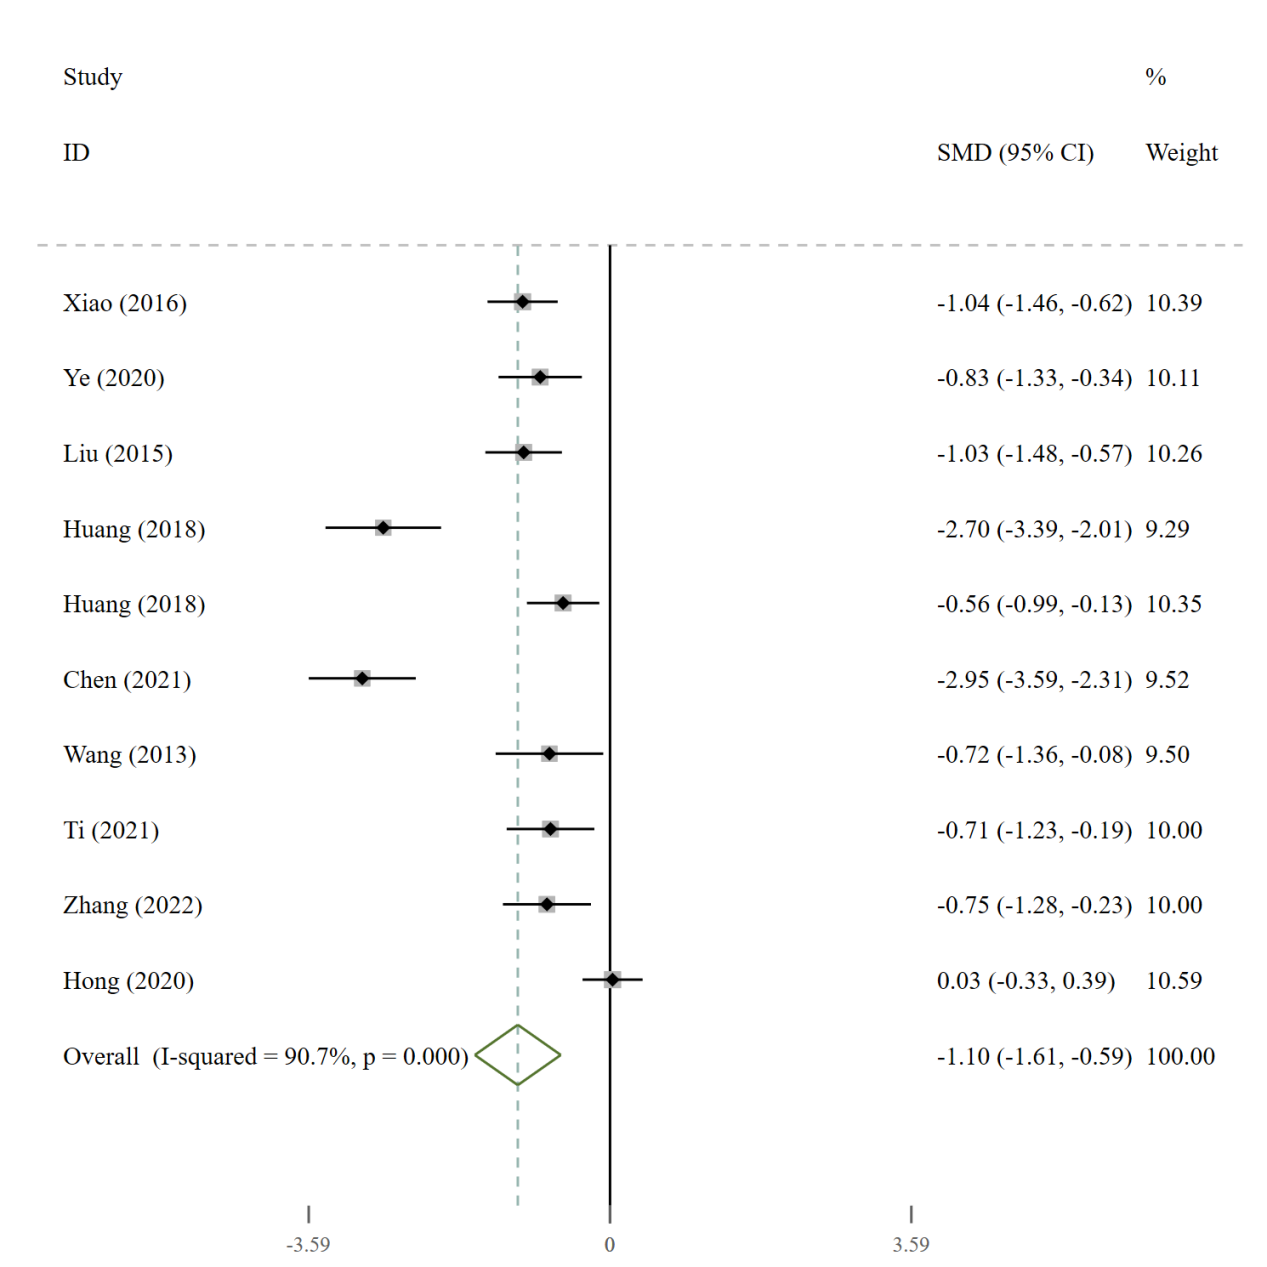
**

**eFigure 2 Forest Plots of Subgroup Analysis of Visual Analogue Scale (VAS): MA vs. CBZ**

**
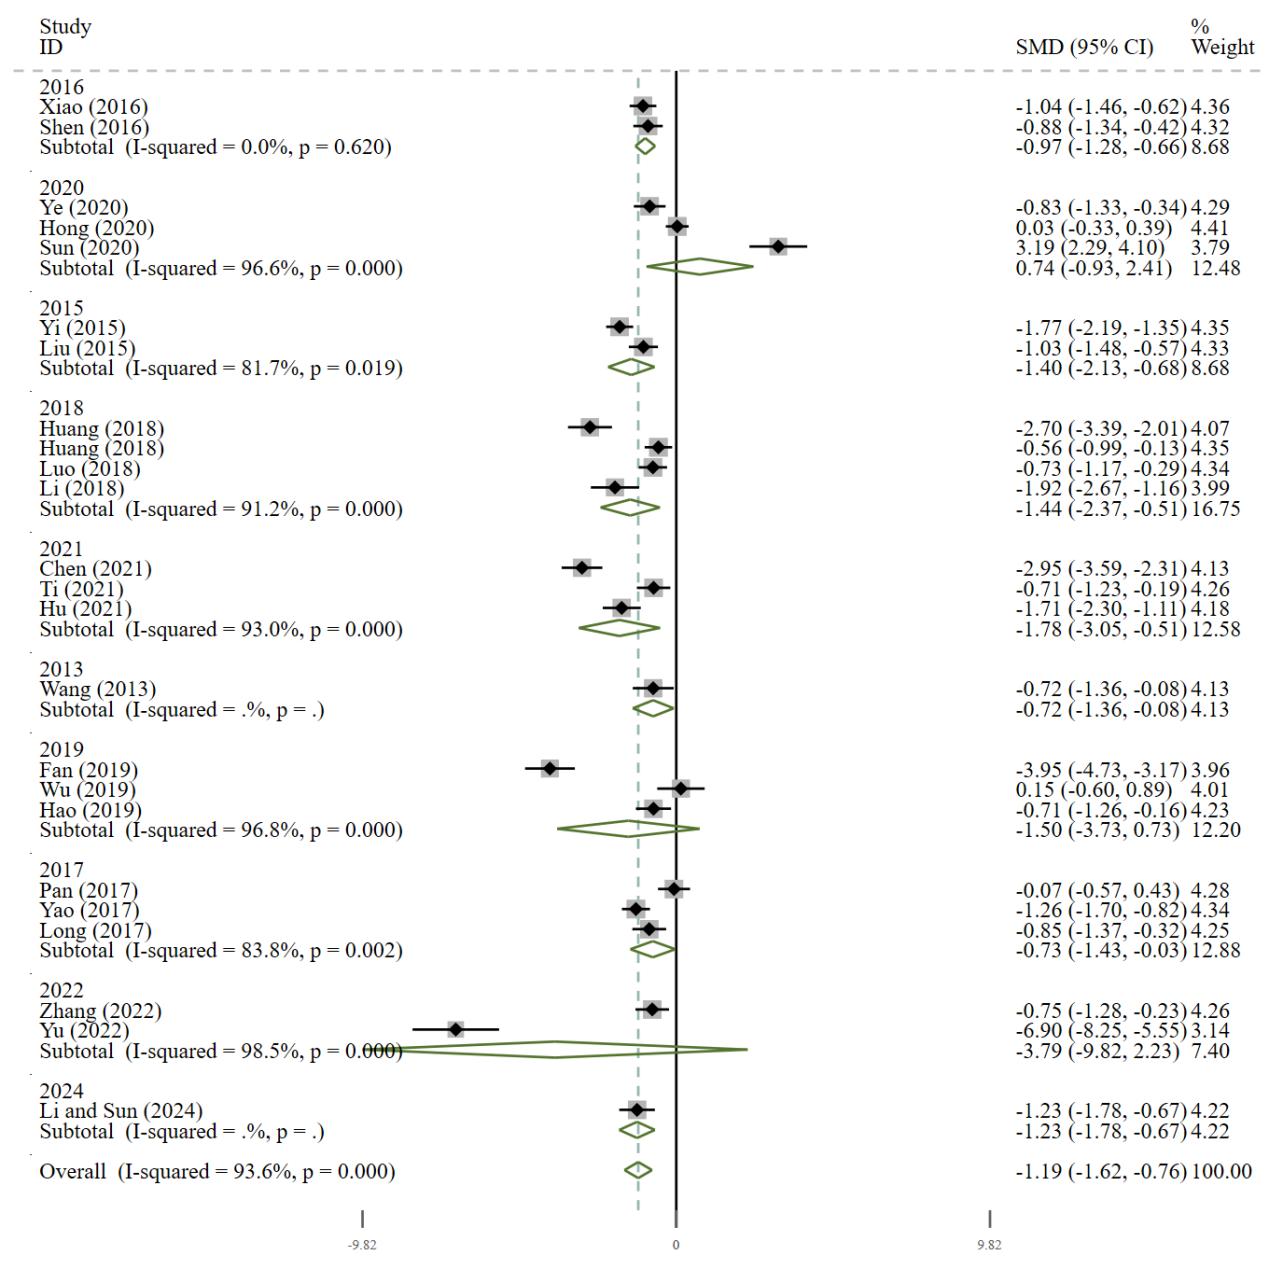
**

**eFigure 3 Forest Plots of Subgroup Analysis of Visual Analogue Scale (VAS) by Study Year**

**
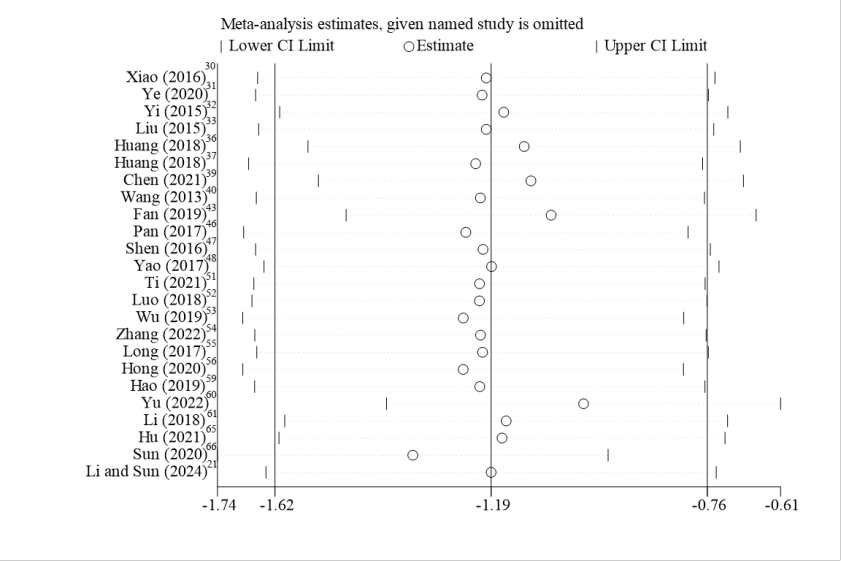
**

**eFigure 4 Sensitivity Analysis of Visual Analogue Scale (VAS)**

**
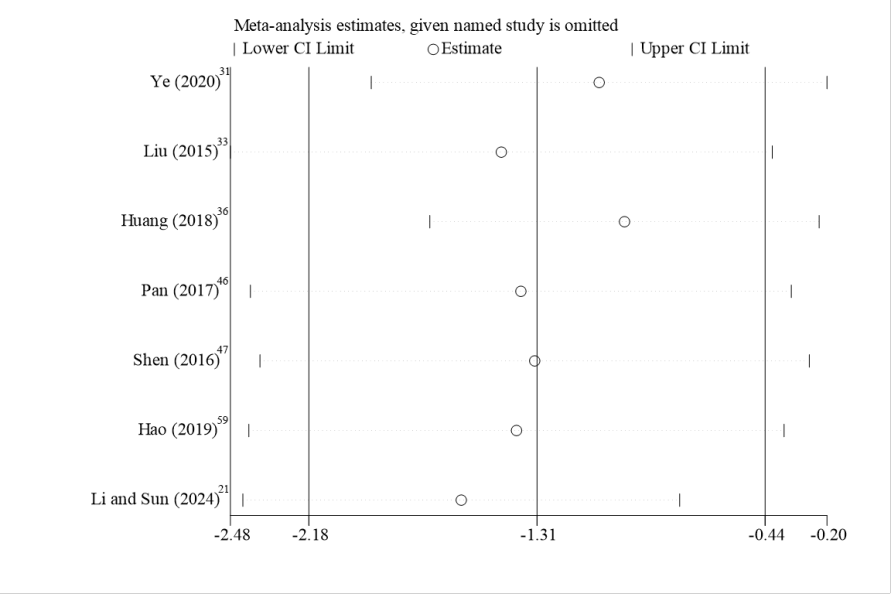
**

**eFigure 5 Sensitivity Analysis of Pain Attack Frequency**

**
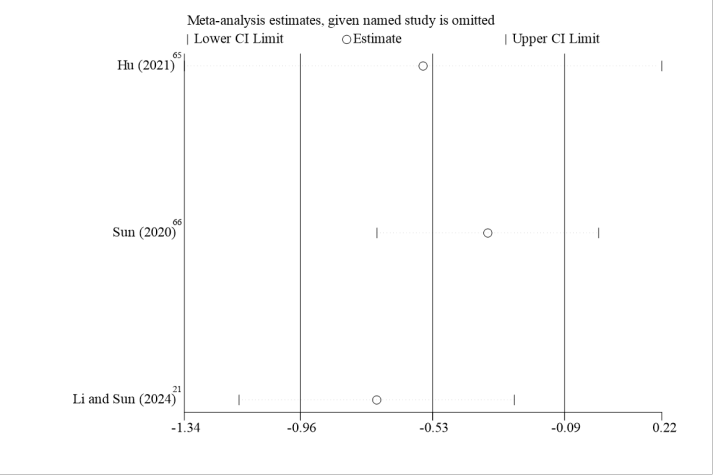
**

**eFigure 6 Sensitivity Analysis of BPI-Facial Pain Severity**

**
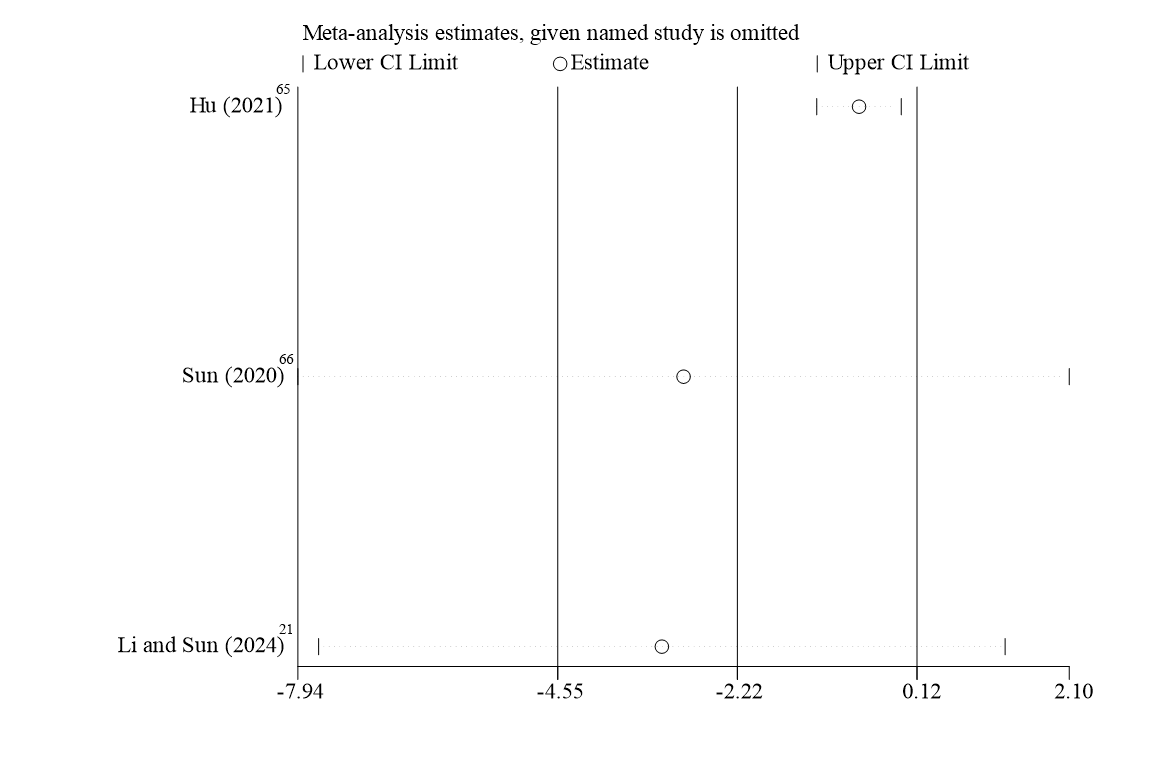
eFigure 7 Sensitivity Analysis of BPI‑Interference with Quality of Life**

**
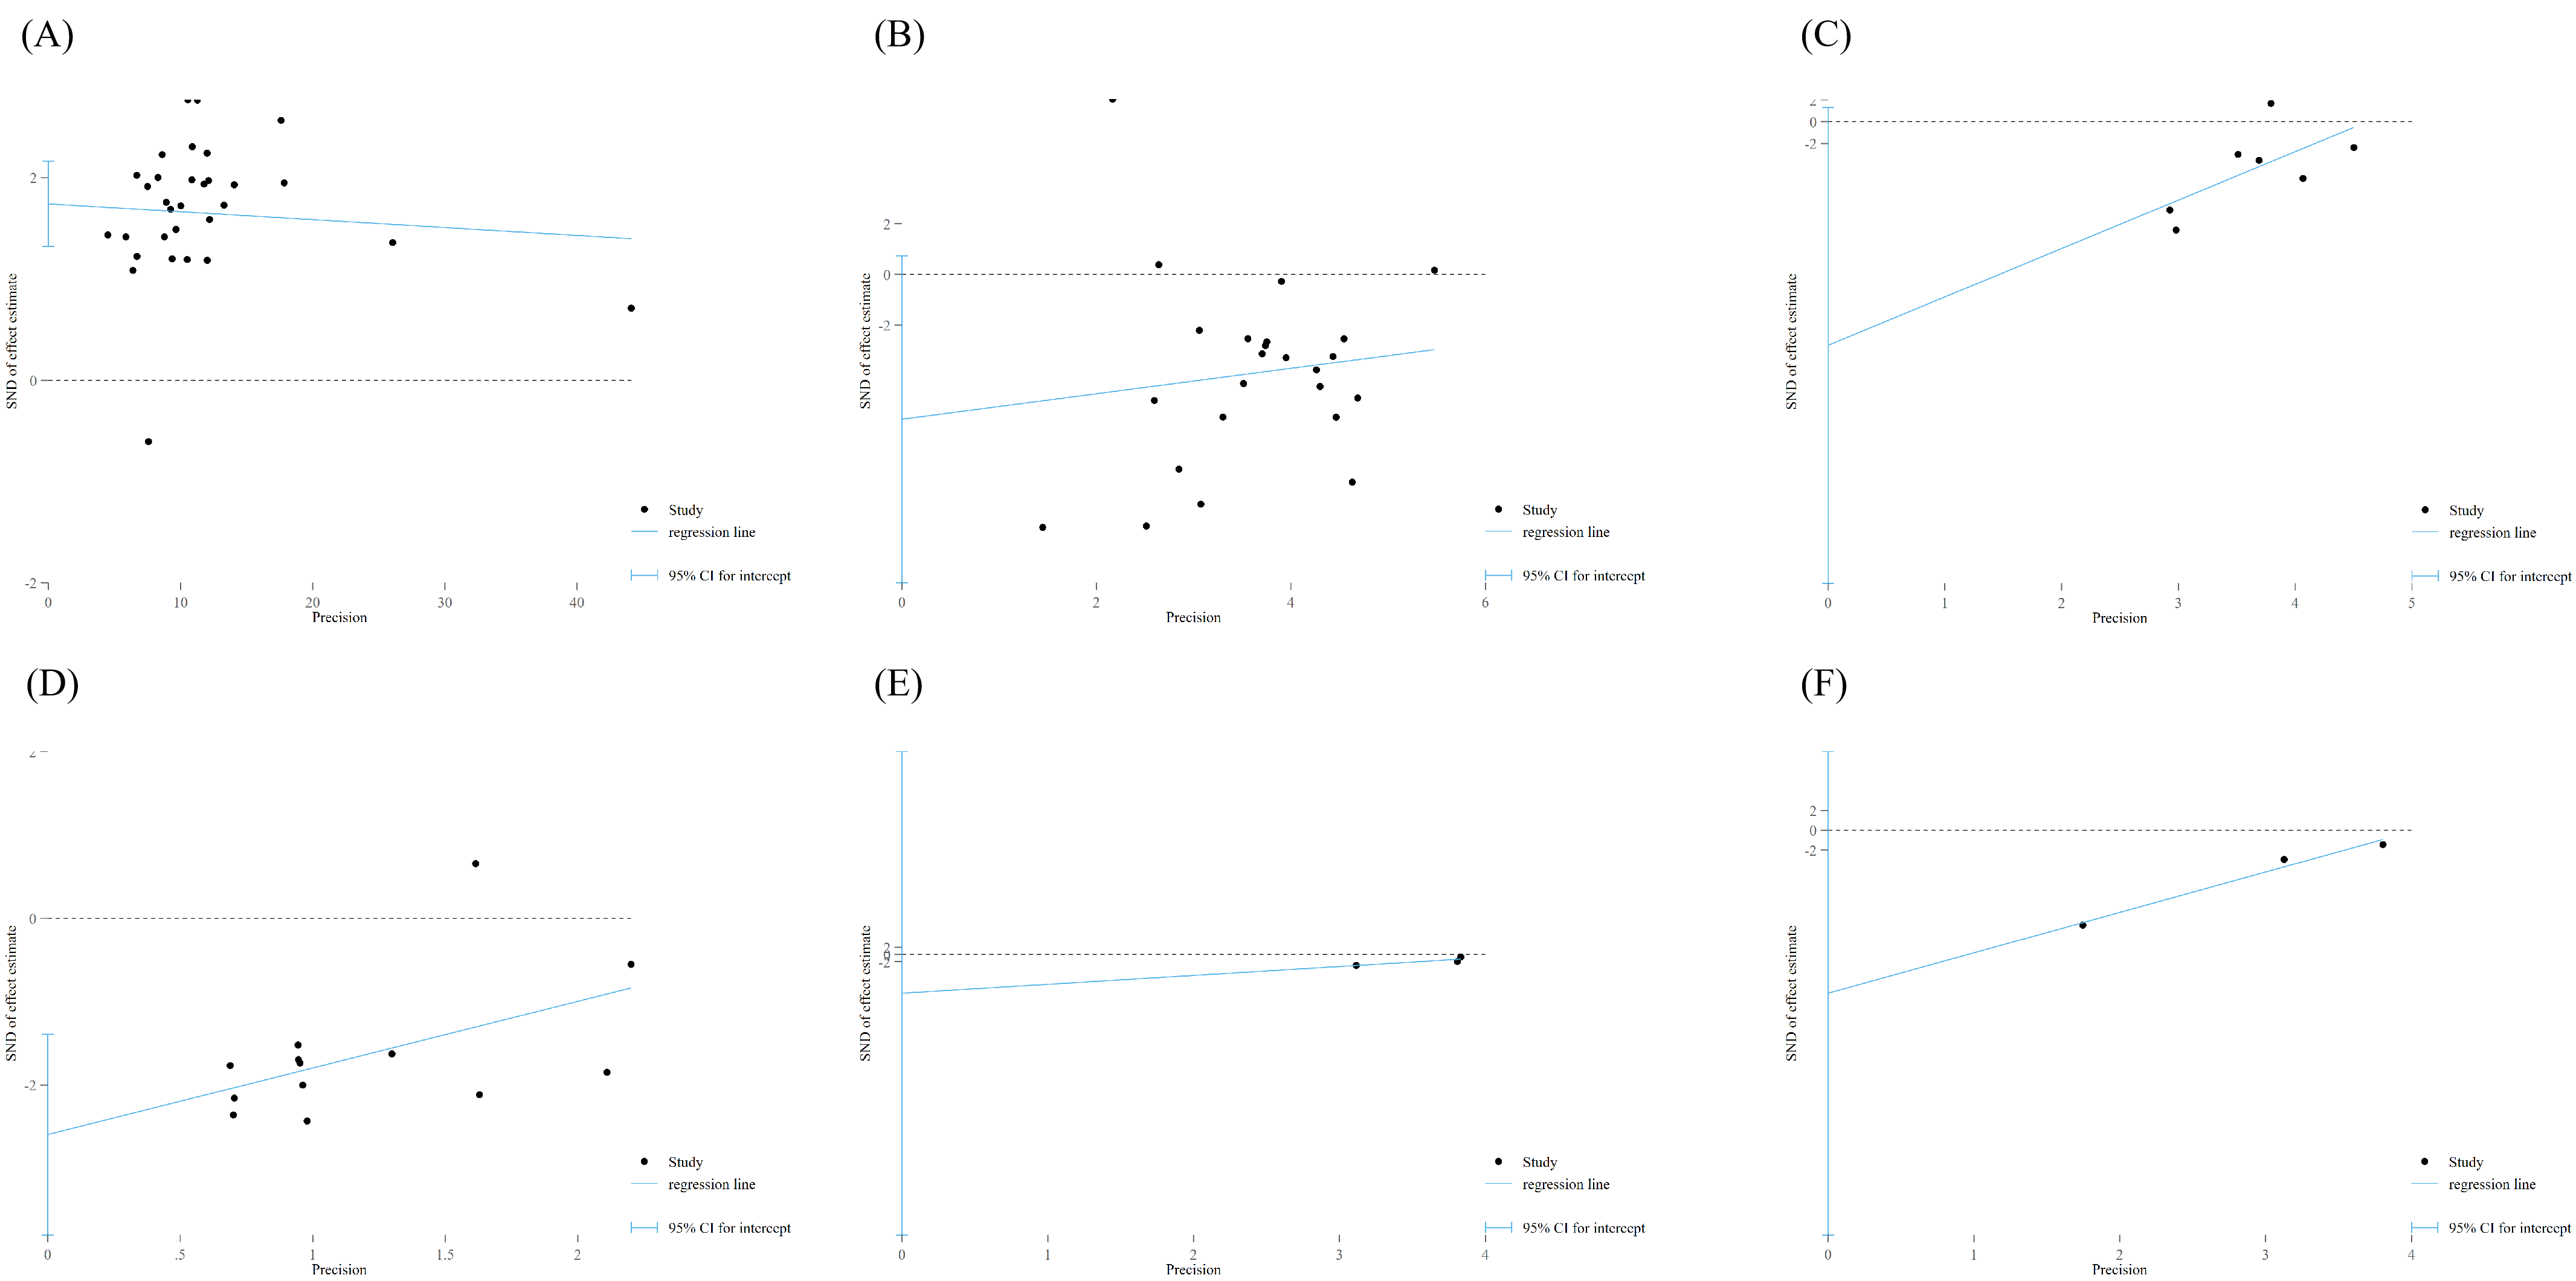
**

**eFigure 8 Egger’s test for publication bias.** (A)Publication Bias of Response Rate.(B)Publication Bias of Visual Analogue Scale (VAS).(C)Publication Bias of Pain Attack Frequency.(D)Publication Bias of Incidence of Adverse Events(AEs).(E)Publication Bias of BPI-Facial Pain Severity.(F)Publication Bias of BPI‑Interference with Quality of Life

**
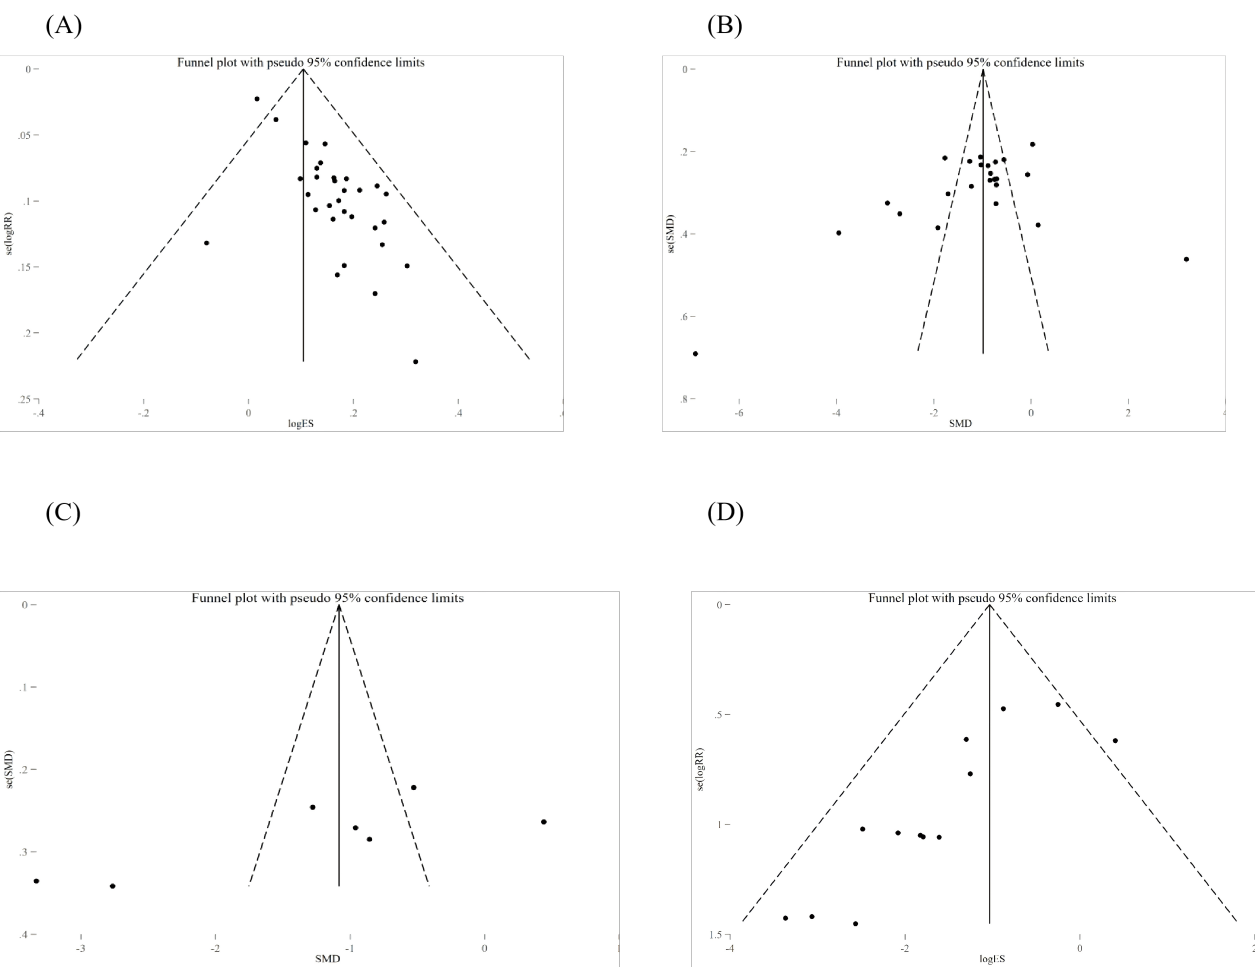
**

**eFigure 9 Funnel Plot of Publication Bias.**(A)Publication Bias of Response Rate.(B)Publication Bias of Visual Analogue Scale (VAS).(C)Publication Bias of Pain Attack Frequency.(D)Publication Bias of Incidence of Adverse Events(AEs)
